# Supplementary material for: Projected Inventory-Level Policies for Lost Sales Inventory Systems: Asymptotic Optimality in Two Regimes
Source: Atypon-hosted journal article supplement (doi:10.1287/opre.2021.0032), 2024-04-01
Supplement: opre.2021.0032.sm1.pdf [file opre.2021.0032.sm1.pdf]

## Technical proofs for companion

### EC.1. Proof of Lemma 1

*Proof.* Suppose actions follow a PIL policy  $P_t^U(\mathbf{x}_t)$  for given  $U \geq 0$ . Suppose the state  $\mathbf{x}_0$  of period 0 satisfies  $\mathbb{E}[J_{\tau-1} | \mathbf{x}_0] \leq U$ . Denote by  $q_\tau \geq 0$  the non-negative order placed in period 0 that attains  $\mathbb{E}[I_\tau | \mathbf{x}_0] = \mathbb{E}[J_{\tau-1} + q_\tau | \mathbf{x}_0] = U$ .

Conditional on  $D_0$  being  $d_0$ , the projected inventory level as seen in period 1 before the order  $q_{\tau+1}$  is placed is given by  $\mathbb{E}[J_\tau | D_0 = d_0]$ . It is sufficient to show that

$$\forall d_0 \geq 0 : \mathbb{E}[J_\tau | \mathbf{x}_0, D_0 = d_0] \leq U, \quad (\text{EC.1})$$

since this implies that for period 1 it is always possible to place a non-negative order  $q_{\tau+1}$  to attain the projected inventory level  $U$ . (Periods 2, 3, ... then follow by induction.) Since  $J_\tau$  is decreasing in  $D_0$  for all  $D_1, \dots, D_\tau$  we find  $\mathbb{E}[J_\tau | D_0 = d_0] \leq \mathbb{E}[J_\tau | D_0 = 0]$ , and hence to show (EC.1) it suffices to demonstrate that  $\mathbb{E}[J_\tau | D_0 = 0] \leq \mathbb{E}[I_\tau] = U$ , which will be the subject of the remainder of this proof.

Define the random variable  $G(y)$  such that  $\mathbb{P}(G(y) \leq g) = \mathbb{P}(I_\tau \leq g | \mathbf{x}_t, J_0 = y)$ , or equivalently  $G(y) = ((\dots((y + q_1 - D_1)^+ + q_2 - D_2)^+ \dots)^+ + q_{\tau-1} - D_{\tau-1})^+ + q_\tau$ . Observe that we have  $\mathbb{E}[I_\tau | \mathbf{x}_0] = \mathbb{E}[G((I_0 - D)^+)]$  and  $\mathbb{E}[J_\tau | D_0 = 0] = \mathbb{E}[(G(I_0) - D)^+]$ . Note that  $0 \leq dG(y)/dy \leq 1$  and  $G(y) \geq 0$  so that

$$(G(I_0) - D)^+ \leq G((I_0 - D)^+). \quad (\text{EC.2})$$

It follows from (EC.2) that  $\mathbb{E}[J_\tau | D_0 = 0] = \mathbb{E}[(G(I_0) - D)^+] \leq \mathbb{E}[G((I_0 - D)^+)] = \mathbb{E}[I_\tau]$ .  $\square$

### EC.2. Proof of Lemma 2

*Proof.* First note that the inventory at the end of a period under  $C^r$  satisfies the Lindley recursion  $J_{t+1} = (J_t + r - D_t)^+$  so that  $\lim_{t \rightarrow \infty} \mathbb{E}[J_t]$  can be determined with the Pollaczek Khinchine equation for the mean waiting time in an  $M/D/1$  queue. Therefore we can express  $g^r$  in closed form as

$$g^r = p(\mu - r) + h \frac{r^2}{2(\mu - r)}. \quad (\text{EC.3})$$

We can now directly verify that inserting (7) and (EC.3) into the right hand side of (6) again equals (7) by using integration by parts and tedious but otherwise straightforward algebra:

$$\begin{aligned}
& \mathbb{E}_D [h(x-D)^+ + p(D-x)^+ + \mathcal{H}^r((x-D)^+ + r)] - g^r \\
&= p\mathbb{E} [(D-x)^+] + h\mathbb{E} [(x-D)^+] + \int_0^x \frac{\mathcal{H}^r(x-y+r)}{\mu} e^{-y/\mu} dy + \mathcal{H}^r(r)e^{-x/\mu} - g^r \\
&= p\mu e^{-x/\mu} + h(x-\mu + \mu e^{-x/\mu}) + e^{-x/\mu} x \left( \frac{h(3r^2 + 3rx + x^2)}{6\mu(\mu-r)} + \frac{pr(2r+x)}{2\mu(\mu-r)} - \frac{p/(2r+x)}{2(\mu-r)} \right) \\
&\quad + e^{-x/\mu} \left( \frac{hr^2}{2(\mu-r)} - pr^2 \right) - p(\mu-r) - h\frac{r^2}{2(\mu-r)} \\
&= \frac{h}{2(\mu-r)} x^2 - px = \mathcal{H}^r(x). \tag{EC.4}
\end{aligned}$$

Clearly  $\mathcal{H}^r(x) = \frac{h}{2(\mu-r)}x^2 - px$  also satisfies  $\mathcal{H}^r(0) = 0$ .  $\square$

### EC.3. Proof of Lemma 4

*Proof.* We prove the following statement by induction on  $t_2$ , starting at  $t_2 = t_1$ :

$$\mathcal{H}^r(I_{t_1}) = \mathbb{E}_{D_{t_1}, \dots, D_{t_2}} [c[t_1, t_2](C^r) + \mathcal{H}^r(I_{t_2+1}) | I_{t_1}] - (t_2 + 1 - t_1)g^r. \tag{EC.6}$$

The base case  $t_2 = t_1$  holds by (6), the definition of  $c_t$ , and  $I_{t_1+1} = (I_{t_1} - D_{t_1}) + r$ . Now for the inductive step, assume that the statement holds for some  $t_2 \geq t_1$ ; we will show it holds also for  $t_2 + 1$ . Use (6) to conclude that

$$\begin{aligned}
\mathbb{E}_{D_{t_1}, \dots, D_{t_2}} [\mathcal{H}^r(I_{t_2+1}) | I_{t_1}] &= \mathbb{E}_{D_{t_1}, \dots, D_{t_2}} \left[ \mathbb{E}_{D_{t_2+1}} [c_{t_2+1} + \mathcal{H}^r((I_{t_2+1} - D_{t_2+1})^+ + r) - g^r | I_{t_2+1}] \Big| I_{t_1} \right] \\
&= \mathbb{E}_{D_{t_1}, \dots, D_{t_2}} \left[ \mathbb{E}_{D_{t_2+1}} [c_{t_2+1} + \mathcal{H}^r(I_{t_2+2}) | I_{t_2+1}] \Big| I_{t_1} \right] - g^r \\
&= \mathbb{E}_{D_{t_1}, \dots, D_{t_2}, D_{t_2+1}} [c_{t_2+1} + \mathcal{H}^r(I_{t_2+2}) | I_{t_1}] - g^r. \tag{EC.7}
\end{aligned}$$

Now substitution of (EC.7) back into the induction hypothesis (EC.6) yields:

$$\begin{aligned}
\mathcal{H}^r(I_{t_1}) &= \mathbb{E}_{D_{t_1}, \dots, D_{t_2}} [c[t_1, t_2](C^r) + \mathcal{H}^r(I_{t_2+1}) | I_{t_1}] - (t_2 + 1 - t_1)g^r \\
&= \mathbb{E}_{D_{t_1}, \dots, D_{t_2+1}} [c[t_1, t_2 + 1](C^r) + \mathcal{H}^r(I_{t_2+2}) | I_{t_1}] - (t_2 + 2 - t_1)g^r. \tag{EC.8}
\end{aligned}$$

By induction, this shows that (EC.6) holds for all  $t_2 \geq t_1$ .  $\square$

## EC.4. Proof of Lemma 5

*Proof.* We have

$$\mathbb{E}[(X + Y)^+] = \int_{x+y \geq 0} (x + y) dF(x, y) = \int_{x=-\infty}^{\infty} \int_{y=-x}^{\infty} (x + y) dF(x, y). \quad (\text{EC.9})$$

For  $x + y \geq 0$  we can write

$$x + y = \int_{z=-y}^x dz. \quad (\text{EC.10})$$

Substitution of (EC.10) into (EC.9) yields

$$\begin{aligned} \mathbb{E}[(X + Y)^+] &= \int_{x=-\infty}^{\infty} \int_{y=-x}^{\infty} \int_{z=-y}^x dz dF(x, y) = \int_{-y \leq z \leq x} dF(x, y) dz \\ &= \int_{z=-\infty}^{\infty} \int_{x=z}^{\infty} \int_{y=-z}^{\infty} dF(x, y) dz = \int_{z=-\infty}^{\infty} \mathbb{P}(X \geq z, Y \geq -z) dz. \quad \square \end{aligned}$$

## EC.5. Proof of Lemma 9

*Proof.* We first derive an identity for  $q[1, T + \tau](P^U) | D_0, \dots, D_{T-1}$ . From (1-3), we find  $J_t - L_t = I_t - D_t = J_{t-1} + q_t - D_t$ , which implies  $J_t - J_{t-1} = L_t + q_t - D_t$ . Summing this identity for  $t = 1, \dots, T + \tau - 1$  yields:  $\sum_{t=1}^{T+\tau-1} J_t - J_{t-1} = J_{T+\tau-1} - J_0 = L[1, T + \tau - 1] + q[1, T + \tau - 1] - D[1, T + \tau - 1]$ . Since  $J_0 = L_0 + I_0 - D_0$  by (1-2), we obtain

$$J_{T+\tau-1} = I_0 + L[0, T + \tau - 1] + q[1, T + \tau - 1] - D[0, T + \tau - 1] \quad (\text{EC.11})$$

Next, note that  $\mathbb{E}(J_{T+\tau-1}(P^U) | D_0, \dots, D_{T-1}) = \mathbb{E}(J_{T+\tau-1}(P^U) | \mathbf{x}_T)$ , since  $\mathbf{x}_T$  is known given  $D_t, \dots, D_{T-1}$ . Thus, Lemma 1 and (4) imply  $\mathbb{E}(J_{T+\tau-1}(P^U) | D_0, \dots, D_{T-1}) = U - q_{T+\tau}(P^U) | D_0, \dots, D_{T-1}$ . Taking the conditional expectation on both sides of (EC.11) and plugging in this latter identity yields  $U - q_{T+\tau}(P^U) | D_0, \dots, D_{T-1} = I_0 + \mathbb{E}(L[0, T + \tau - 1] + q[1, T + \tau - 1] - D[0, T + \tau - 1] | D_0, \dots, D_{T-1})$ . Using  $\mathbb{E}(D[0, T + \tau - 1] | D_0, \dots, D_{T-1}) = D[0, T - 1] + \tau\mu$  and rearranging terms yields:

$$\begin{aligned} &q[1, T + \tau](P^U) | D_0, \dots, D_{T-1} \\ &= U - I_0 - D[0, T - 1] - \tau\mu - \mathbb{E}[L[1, T + \tau - 1](P^U) | D_0, \dots, D_{T-1}] \end{aligned} \quad (\text{EC.12})$$

We are now ready to prove Properties 1 and 2 by induction. As induction hypothesis, let  $T \in \mathbb{N}$  and suppose that  $\forall t < T$  and for all demand sequences  $D_0, D_1, \dots$  the random variables  $q[1, t + \tau](P^U) | D_0, \dots, D_{t-1}$  are non-decreasing and concave, while the random variables  $L[1, t + \tau](P^U) | D_0, \dots, D_{t+\tau}$  are non-increasing and convex. We will prove that these random variables are also non-decreasing and concave (resp. non-increasing and convex) for  $t = T$ .

Since  $L[1, T + \tau - 1](P^U) | D_0, \dots, D_{T+\tau-1}$  is non-increasing and convex in  $U$  by induction hypothesis, and since these properties are preserved in expectation, we find that  $\mathbb{E}[L[1, T + \tau - 1](P^U) | D_0, \dots, D_{T+\tau-1} | D_0, \dots, D_{T-1}] = \mathbb{E}[L[1, T + \tau - 1](P^U) | D_0, \dots, D_{T-1}]$  is non-increasing and convex in  $U$  for every realization  $D_0, \dots, D_{T-1}$ . By (EC.12) and since  $U$  is non-decreasing and concave in  $U$ , this implies that  $q[1, T + \tau](P^U) | D_0, \dots, D_{T-1}$  is non-decreasing and concave in  $U$ . Next, specializing (17) to  $P^U$ , we find:

$$L[0, T + \tau](P^U) = \max_{k \in \{0, \dots, T + \tau\}} (D[0, k] - I_0 - q[1, k](P^U))^+, \quad (\text{EC.13})$$

Since  $L[0, T + \tau](P^U)$  is the maximum of a number of functions, that by induction hypothesis and by the result we just proved are decreasing and convex in  $U$ ,  $L[0, T + \tau](P^U)$  must also be decreasing and convex in  $U$ . This proves the inductive step.

Now note that our induction hypothesis holds for  $T = 1$  since in that case the functions are independent of  $U$ , and hence non-increasing and convex (non-decreasing and concave). This completes our proof by induction of Properties 1 and 2. For Property 3, note that it follows directly from Property 2.  $\square$

## EC.6. Explicit recursions for inventory projection

All probabilities below will be conditional on the state at time 0,  $\mathbf{x}_0$ . We omit this condition as it makes the derivations more readable. From equations (1)-(3), we obtain the following recursive expressions for any  $t \in \{0, \dots, \tau\}$ :

$$\mathbb{P}(\tilde{J}_t = x) = \sum_{k=0}^{\infty} \mathbb{P}((\tilde{I}_t - K_t)^+ = x | K_t = k) \mathbb{P}(K_t = k) = \sum_{k=0}^x \mathbb{P}(\tilde{I}_t = x - k) \theta_k \quad (\text{EC.14})$$

$$\mathbb{P}(\tilde{L}_t = x) = \sum_{k=0}^{\infty} \mathbb{P}\left((K_t - \tilde{I}_t)^+ = x \mid K_t = k\right) \mathbb{P}(K_t = k) = \sum_{k=x+1}^{\infty} \mathbb{P}(\tilde{I}_t = k - x) \theta_k \quad (\text{EC.15})$$

$$\mathbb{P}(\tilde{I}_t = x) = \mathbb{P}(\tilde{J}_{t-1} + Q_t = x) = \sum_{y=0}^{\infty} \mathbb{P}(\tilde{J}_{t-1} = x - y) \mathbb{P}(Q_t = y), \quad (\text{EC.16})$$

These recursions can be applied running from  $t = 0$  till  $t = \tau$  as  $\tilde{I}_0$  and  $Q_t$ ,  $t \in \{1, \dots, \tau - 1\}$  have Poisson distributions with means  $\lambda I_0$  and  $\lambda q_t$  conditional on  $\mathbf{x}_0 = (I_0, q_1, \dots, q_{\tau-1})$  when demand has a ME distribution with scale  $\lambda$ :

$$\mathbb{P}(\tilde{I}_0 = x) = e^{-\lambda I_0} \frac{(\lambda I_0)^x}{x!}, \quad \mathbb{P}(Q_t = x) = e^{-\lambda q_t} \frac{(\lambda q_t)^x}{x!}. \quad (\text{EC.17})$$

## EC.7. Two moment fits for mixed Erlang distributions

This Section provides the two moment fits that can also be found in Tijms (2003) or van Houtum (2006). Suppose that  $D := \sum_{i=1}^K E_i$  where  $\{E_i\}_{i=1}^{\infty}$  is a sequence of i.i.d. exponential random variables with rate  $\lambda$  and that  $K$  is an independent discrete random variable on the integers with mass function  $\theta_k = \mathbb{P}(K = k)$ . When the mean  $\mu = \mathbb{E}[D]$  of demand and the squared coefficient of variation  $c_D^2 = \mathbf{Var}[D]/\mu^2$  are known, the following two point distribution for  $K_t$  and choice for  $\lambda$  will match these moments when  $c_D^2 \leq 1$ :

$$\theta_k = \begin{cases} p & \text{if } k = k_1 \\ 1 - p & \text{if } k = k_2 \\ 0 & \text{otherwise} \end{cases}, \quad \lambda = \frac{k_1 - p}{\mu},$$

with

$$k_1 := \left\lfloor \frac{1}{c_D^2} \right\rfloor, \quad k_2 = k_1 + 1, \quad p = \frac{k_1 c_D^2 - \sqrt{k_1(1 + c_D^2) - k_1^2 c_D^2}}{1 + c_D^2}.$$

When  $c_D^2 > 1$ , then an appropriate parameterization of a mixed Erlang distribution is

$$\theta_k = \begin{cases} p & \text{if } k = k_1 \\ 1 - p & \text{if } k = k_2 \\ 0 & \text{otherwise} \end{cases}, \quad \lambda = \frac{p + k_2(1 - p)}{\mu},$$

with

$$k_1 = 1, \quad k_2 = \max\left(3, \left\lceil \frac{4c_D^2 + \sqrt{16(c_D^2 - 1)}}{2} \right\rceil\right), \quad p = \frac{k_1 c_D^2 - \sqrt{k_1(1 + c_D^2) - k_1^2 c_D^2}}{1 + c_D^2}.$$
